# Supplementary material
Source: MDPI journal article supplement (https://www.mdpi.com/search?q=molbank-2023-M1556)
Supplement: s002 [file molbank-2023-M1556-s002-mod.mol]

14-08.mol
  corina  01172311133D 1   1.00000     0.00000 
CORINA 4.4.0 0026  12.08.2021
 15 15  0  0  0  0  0  0  0  0999 V2000
   -1.1699   -0.8488    0.7972 C   0  0  0  0  0  0  0  0  0  0  0  0
    0.0971   -0.0633    0.5766 C   0  0  0  0  0  0  0  0  0  0  0  0
    1.2231   -0.6951    0.1857 C   0  0  0  0  0  0  0  0  0  0  0  0
    0.1054    1.2895    0.7727 N   0  0  0  0  0  0  0  0  0  0  0  0
    2.4559   -0.0026    0.1774 C   0  0  0  0  0  0  0  0  0  0  0  0
    3.5542   -0.5880   -0.3398 N   0  0  0  0  0  0  0  0  0  0  0  0
    2.5252    1.1229    0.6376 O   0  0  0  0  0  0  0  0  0  0  0  0
   -1.0763    1.9569    1.3244 C   0  0  0  0  0  0  0  0  0  0  0  0
   -0.8057    3.4582    1.4418 C   0  0  0  0  0  0  0  0  0  0  0  0
    4.7454    0.1360   -0.4518 C   0  0  0  0  0  0  0  0  0  0  0  0
    5.9594   -0.4717   -0.1586 C   0  0  0  0  0  0  0  0  0  0  0  0
    7.1341    0.2460   -0.2708 C   0  0  0  0  0  0  0  0  0  0  0  0
    7.1024    1.5681   -0.6749 C   0  0  0  0  0  0  0  0  0  0  0  0
    5.8954    2.1760   -0.9679 C   0  0  0  0  0  0  0  0  0  0  0  0
    4.7176    1.4627   -0.8620 C   0  0  0  0  0  0  0  0  0  0  0  0
  1  2  1  0      
  2  3  2  0      
  2  4  1  0      
  3  5  1  0      
  5  6  1  0      
  5  7  2  0      
  4  8  1  0      
  8  9  1  0      
  6 10  1  0      
 10 11  2  0      
 11 12  1  0      
 12 13  2  0      
 13 14  1  0      
 14 15  2  0      
 15 10  1  0      
M  END
$$$$
