# Supplementary material
Source: MDPI journal article supplement (https://www.mdpi.com/search?q=molbank-2023-M1556)
Supplement: s002 [file molbank-2023-M1556-s002.inchi]

InChI=1S/C12H16N2O/c1-3-13-10(2)9-12(15)14-11-7-5-4-6-8-11/h4-9,13H,3H2,1-2H3,(H,14,15)/b10-9-
AuxInfo=1/1/N:9,1,8,13,12,14,11,15,3,2,10,5,4,6,7/E:(5,6)(7,8)/rA:15CCCNCNOCCCCCCCC/rB:s1;d+2;s2;s3;s5;d5;s4;s8;s6;d10;s11;d12;s13;s10d14;/rC:-4.668,-2.31,0;-3.3342,-1.54,0;-2.0005,-2.31,0;-3.3342,0,0;-.6668,-1.54,0;.6668,-2.31,0;-.6668,0,0;-4.668,.77,0;-4.668,2.31,0;2.0005,-1.54,0;3.3342,-2.31,0;4.668,-1.54,0;4.668,0,0;3.3342,.77,0;2.0005,0,0;
