# Supplementary material
Source: MDPI journal article supplement (https://www.mdpi.com/search?q=molbank-2023-M1556)
Supplement: s002 [file molbank-2023-M1556-s002.mol]

14-08.mol
  ChemDraw04121614272D

 15 15  0  0  0  0  0  0  0  0999 V2000
   -2.5007   -1.2375    0.0000 C   0  0  0  0  0  0  0  0  0  0  0  0
   -1.7862   -0.8250    0.0000 C   0  0  0  0  0  0  0  0  0  0  0  0
   -1.0717   -1.2375    0.0000 C   0  0  0  0  0  0  0  0  0  0  0  0
   -1.7862    0.0000    0.0000 N   0  0  0  0  0  0  0  0  0  0  0  0
   -0.3572   -0.8250    0.0000 C   0  0  0  0  0  0  0  0  0  0  0  0
    0.3572   -1.2375    0.0000 N   0  0  0  0  0  0  0  0  0  0  0  0
   -0.3572    0.0000    0.0000 O   0  0  0  0  0  0  0  0  0  0  0  0
   -2.5007    0.4125    0.0000 C   0  0  0  0  0  0  0  0  0  0  0  0
   -2.5007    1.2375    0.0000 C   0  0  0  0  0  0  0  0  0  0  0  0
    1.0717   -0.8250    0.0000 C   0  0  0  0  0  0  0  0  0  0  0  0
    1.7862   -1.2375    0.0000 C   0  0  0  0  0  0  0  0  0  0  0  0
    2.5007   -0.8250    0.0000 C   0  0  0  0  0  0  0  0  0  0  0  0
    2.5007   -0.0000    0.0000 C   0  0  0  0  0  0  0  0  0  0  0  0
    1.7862    0.4125    0.0000 C   0  0  0  0  0  0  0  0  0  0  0  0
    1.0717   -0.0000    0.0000 C   0  0  0  0  0  0  0  0  0  0  0  0
  1  2  1  0      
  2  3  2  0      
  2  4  1  0      
  3  5  1  0      
  5  6  1  0      
  5  7  2  0      
  4  8  1  0      
  8  9  1  0      
  6 10  1  0      
 10 11  2  0      
 11 12  1  0      
 12 13  2  0      
 13 14  1  0      
 14 15  2  0      
 15 10  1  0      
M  END
