# Supplementary material
Source: MDPI journal article supplement (https://www.mdpi.com/search?q=molbank-2023-M1556)
Supplement: s003 [file molbank-2023-M1556-s003.inchi]

InChI=1S/C22H24N4O5/c1-4-23-15(2)20(21(28)24-16-10-6-5-7-11-16)19(27)14-25(3)22(29)17-12-8-9-13-18(17)26(30)31/h5-13,23H,4,14H2,1-3H3,(H,24,28)/b20-15-
AuxInfo=1/1/N:14,1,21,13,17,16,18,25,26,15,19,24,27,10,2,8,23,28,9,3,4,20,6,5,12,29,11,7,22,30,31/E:(6,7)(10,11)(30,31)/CRV:26.5/rA:31CCCCNNOCCCONCCCCCCCCCOCCCCCCN+OO-/rB:s1;d2;s3;s4;s2;d4;s5;s3;s9;d9;s10;s6;s13;d8;s15;d16;s17;s8d18;s12;s12;d20;s20;d23;s24;d25;s26;s23d27;s28;d29;s29;/rC:-4.6678,2.31,0;-3.3342,3.08,0;-2.0005,2.31,0;-.6668,3.08,0;.6668,2.31,0;-3.3342,4.62,0;-.6668,4.62,0;2.0005,3.08,0;-2.0005,.77,0;-.6668,0,0;-3.3342,0,0;-.6668,-1.54,0;-4.6678,5.39,0;-4.6678,6.93,0;3.3342,2.31,0;4.6678,3.08,0;4.6678,4.62,0;3.3342,5.39,0;2.0005,4.62,0;.6668,-2.31,0;-2.0005,-2.31,0;2.0005,-1.54,0;.6668,-3.85,0;-.6668,-4.62,0;-.6668,-6.16,0;.6668,-6.93,0;2.0005,-6.16,0;2.0005,-4.62,0;3.3316,-3.85,0;3.3303,-2.31,0;4.6658,-4.6189,0;
