# Supplementary material
Source: MDPI journal article supplement (https://www.mdpi.com/search?q=molbank-2023-M1556)
Supplement: s004 [file molbank-2023-M1556-s004.inchi]

InChI=1S/C9H14N2O2/c1-4-10-6(2)8-7(12)5-11(3)9(8)13/h10H,4-5H2,1-3H3/b8-6+
AuxInfo=1/0/N:13,11,6,12,2,9,1,5,4,10,3,8,7/rA:13CCNCCCOOCNCCC/rB:s1;s2;s3;s1s4;s3;d4;d1;d5;s9;s9;s10;s12;/rC:-1.3361,-1.104,0;-1.3361,-2.6493,0;.1335,-3.1269,0;1.042,-1.8766,0;.1335,-.6265,0;.6095,-4.5915,0;2.5818,-1.8766,0;-2.5818,-.1989,0;.6095,.838,0;-.4209,1.9825,0;2.1158,1.1583,0;.0549,3.447,0;-.9755,4.5915,0;
