# Supplementary material
Source: MDPI journal article supplement (https://www.mdpi.com/search?q=molbank-2023-M1556)
Supplement: s004 [file molbank-2023-M1556-s004.mol]

PA22-50.mol
  ChemDraw12182217192D

 13 13  0  0  0  0  0  0  0  0999 V2000
   -0.7133   -0.5894    0.0000 C   0  0  0  0  0  0  0  0  0  0  0  0
   -0.7133   -1.4144    0.0000 C   0  0  0  0  0  0  0  0  0  0  0  0
    0.0713   -1.6694    0.0000 N   0  0  0  0  0  0  0  0  0  0  0  0
    0.5563   -1.0019    0.0000 C   0  0  0  0  0  0  0  0  0  0  0  0
    0.0713   -0.3345    0.0000 C   0  0  0  0  0  0  0  0  0  0  0  0
    0.3254   -2.4513    0.0000 C   0  0  0  0  0  0  0  0  0  0  0  0
    1.3784   -1.0019    0.0000 O   0  0  0  0  0  0  0  0  0  0  0  0
   -1.3784   -0.1062    0.0000 O   0  0  0  0  0  0  0  0  0  0  0  0
    0.3254    0.4474    0.0000 C   0  0  0  0  0  0  0  0  0  0  0  0
   -0.2247    1.0584    0.0000 N   0  0  0  0  0  0  0  0  0  0  0  0
    1.1296    0.6184    0.0000 C   0  0  0  0  0  0  0  0  0  0  0  0
    0.0293    1.8403    0.0000 C   0  0  0  0  0  0  0  0  0  0  0  0
   -0.5208    2.4513    0.0000 C   0  0  0  0  0  0  0  0  0  0  0  0
  1  2  1  0      
  2  3  1  0      
  3  4  1  0      
  4  5  1  0      
  5  1  1  0      
  3  6  1  0      
  4  7  2  0      
  1  8  2  0      
  5  9  2  0      
  9 10  1  0      
  9 11  1  0      
 10 12  1  0      
 12 13  1  0      
M  END
